# Supplementary material
Source: PubMed Central journal article supplement (PMC9041510)

Figure S1

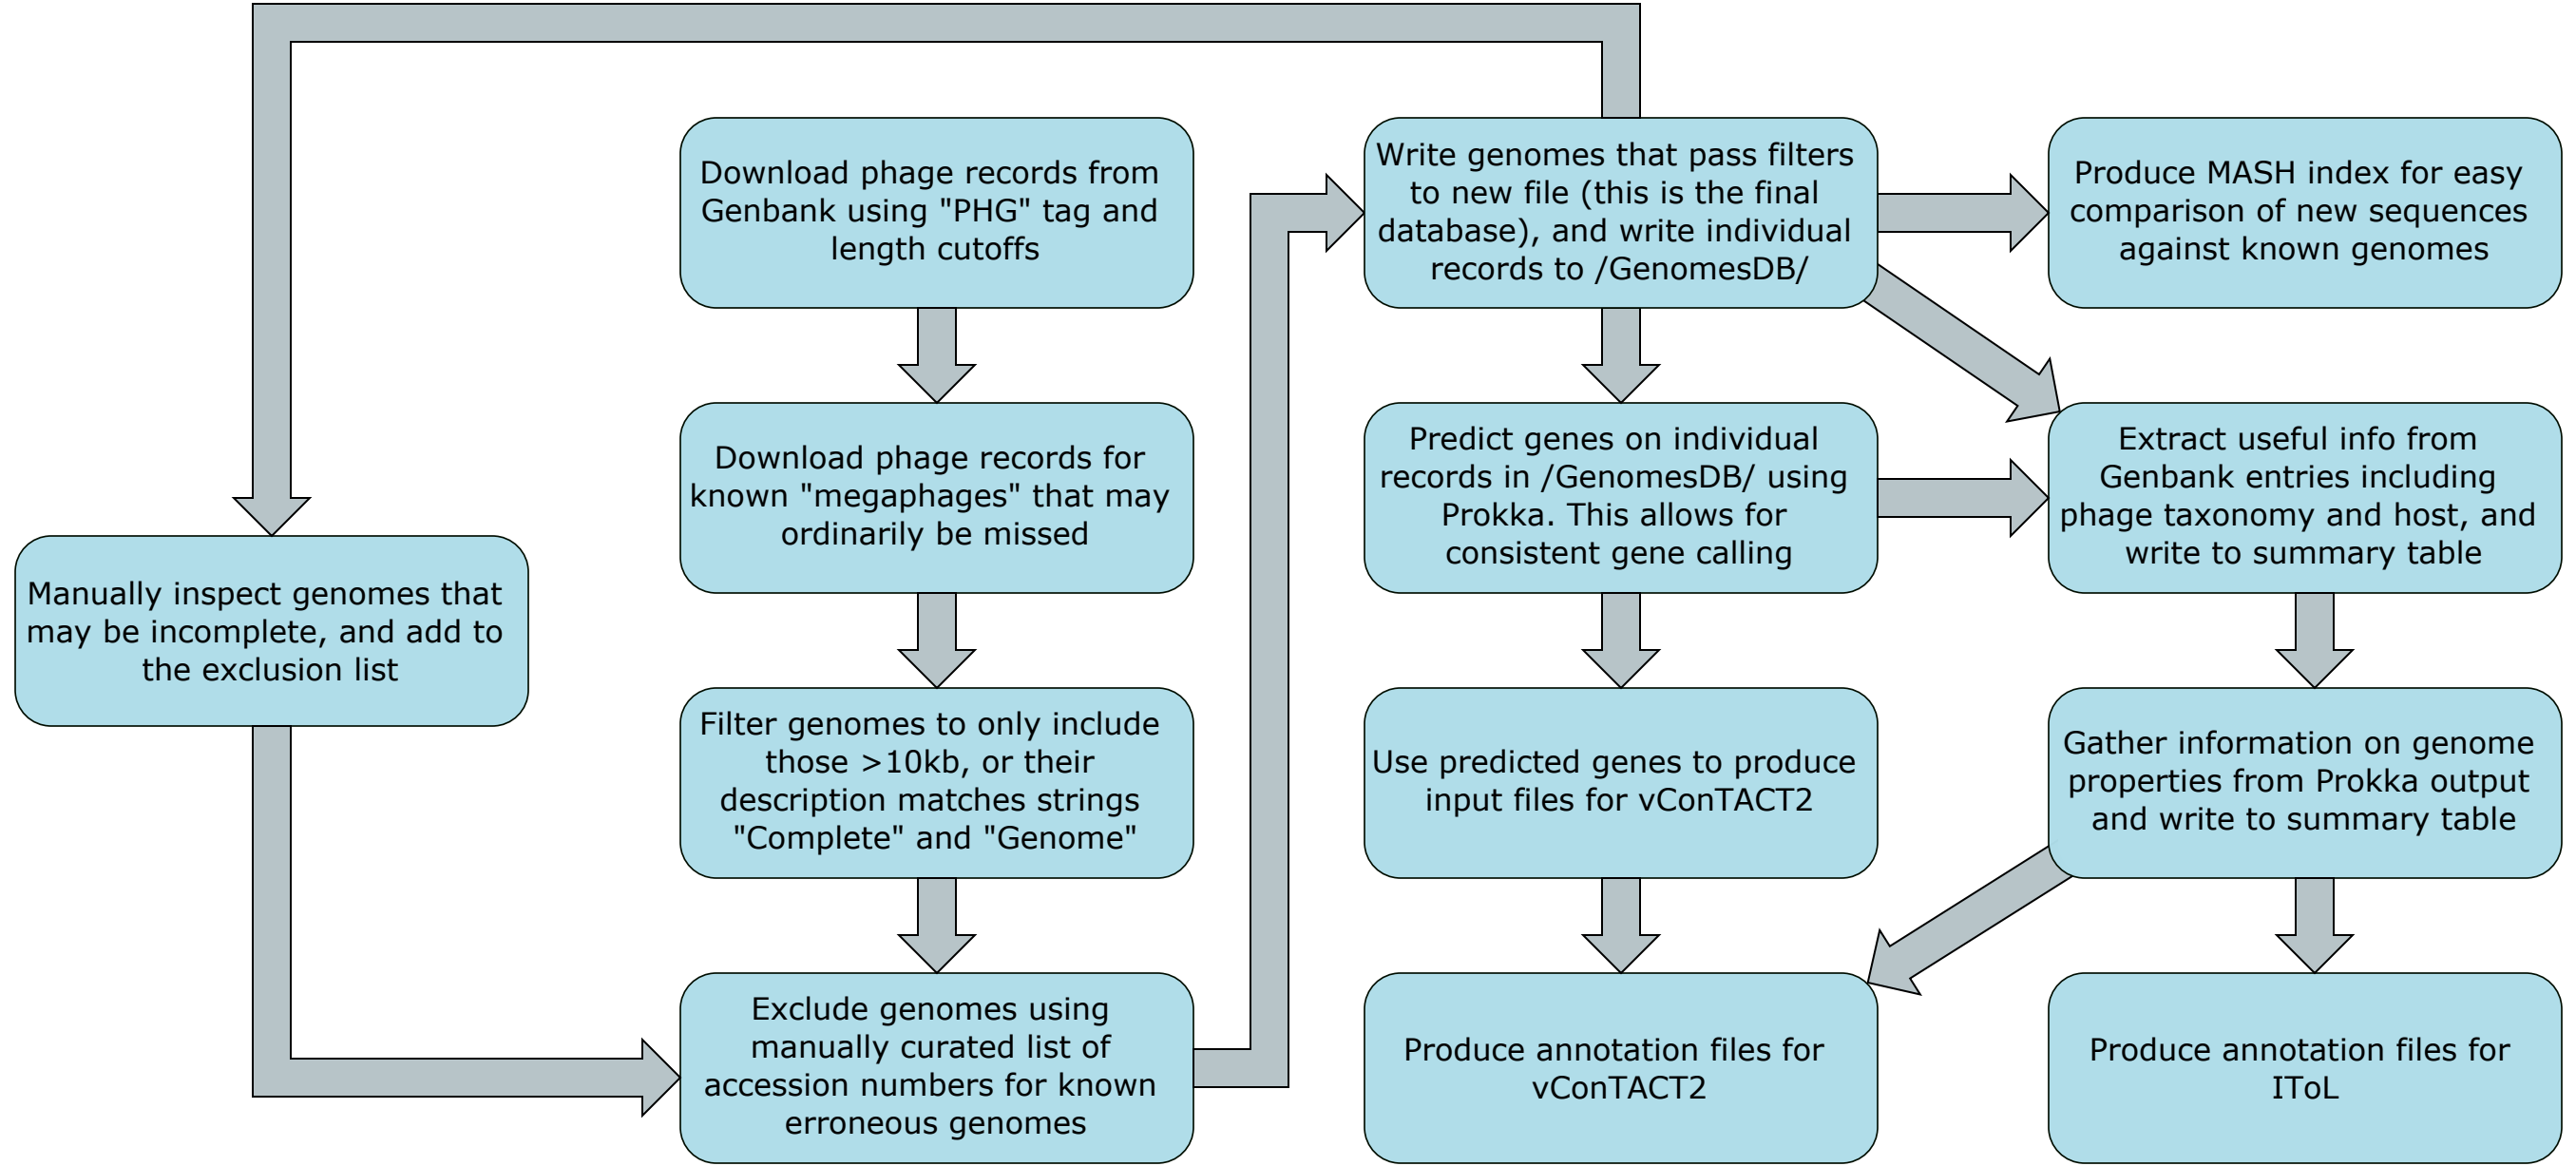

Supplement: supplementary_figure1.pdf [file supplementary_figure1.pdf]

Figure S2

A

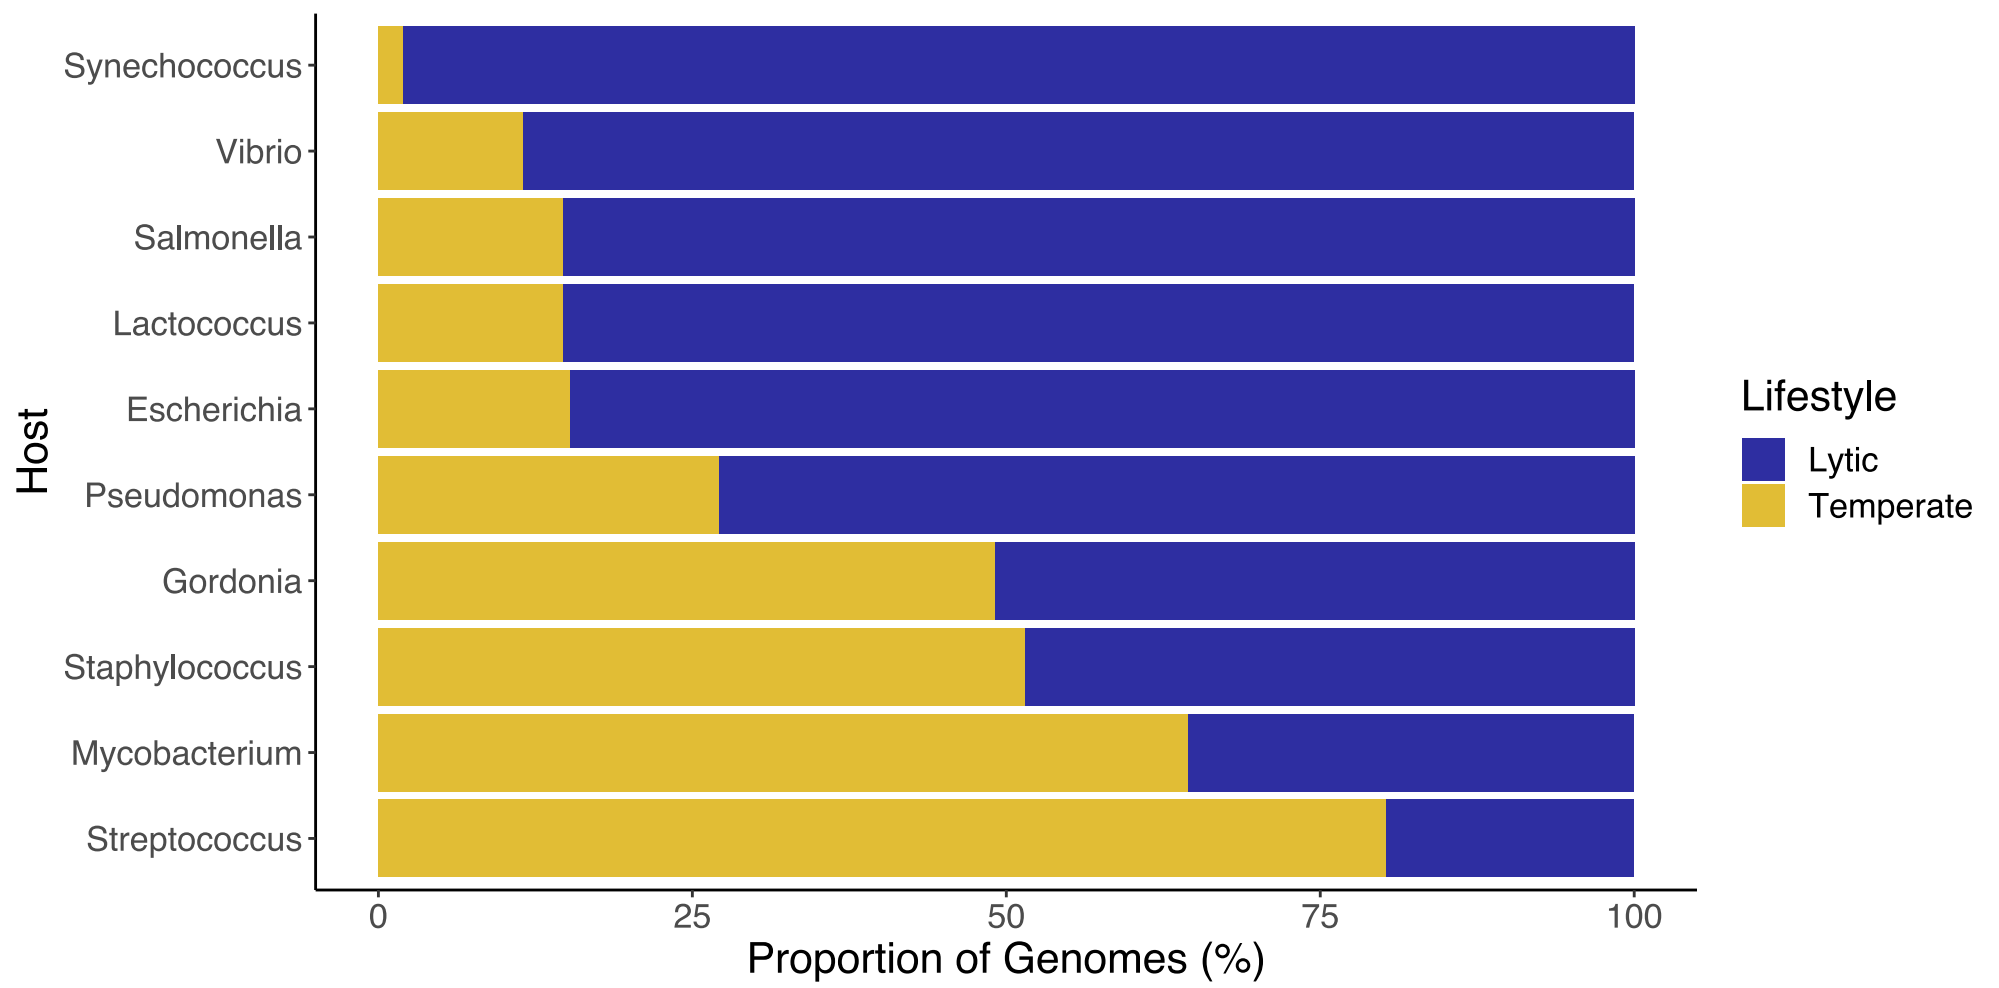

B

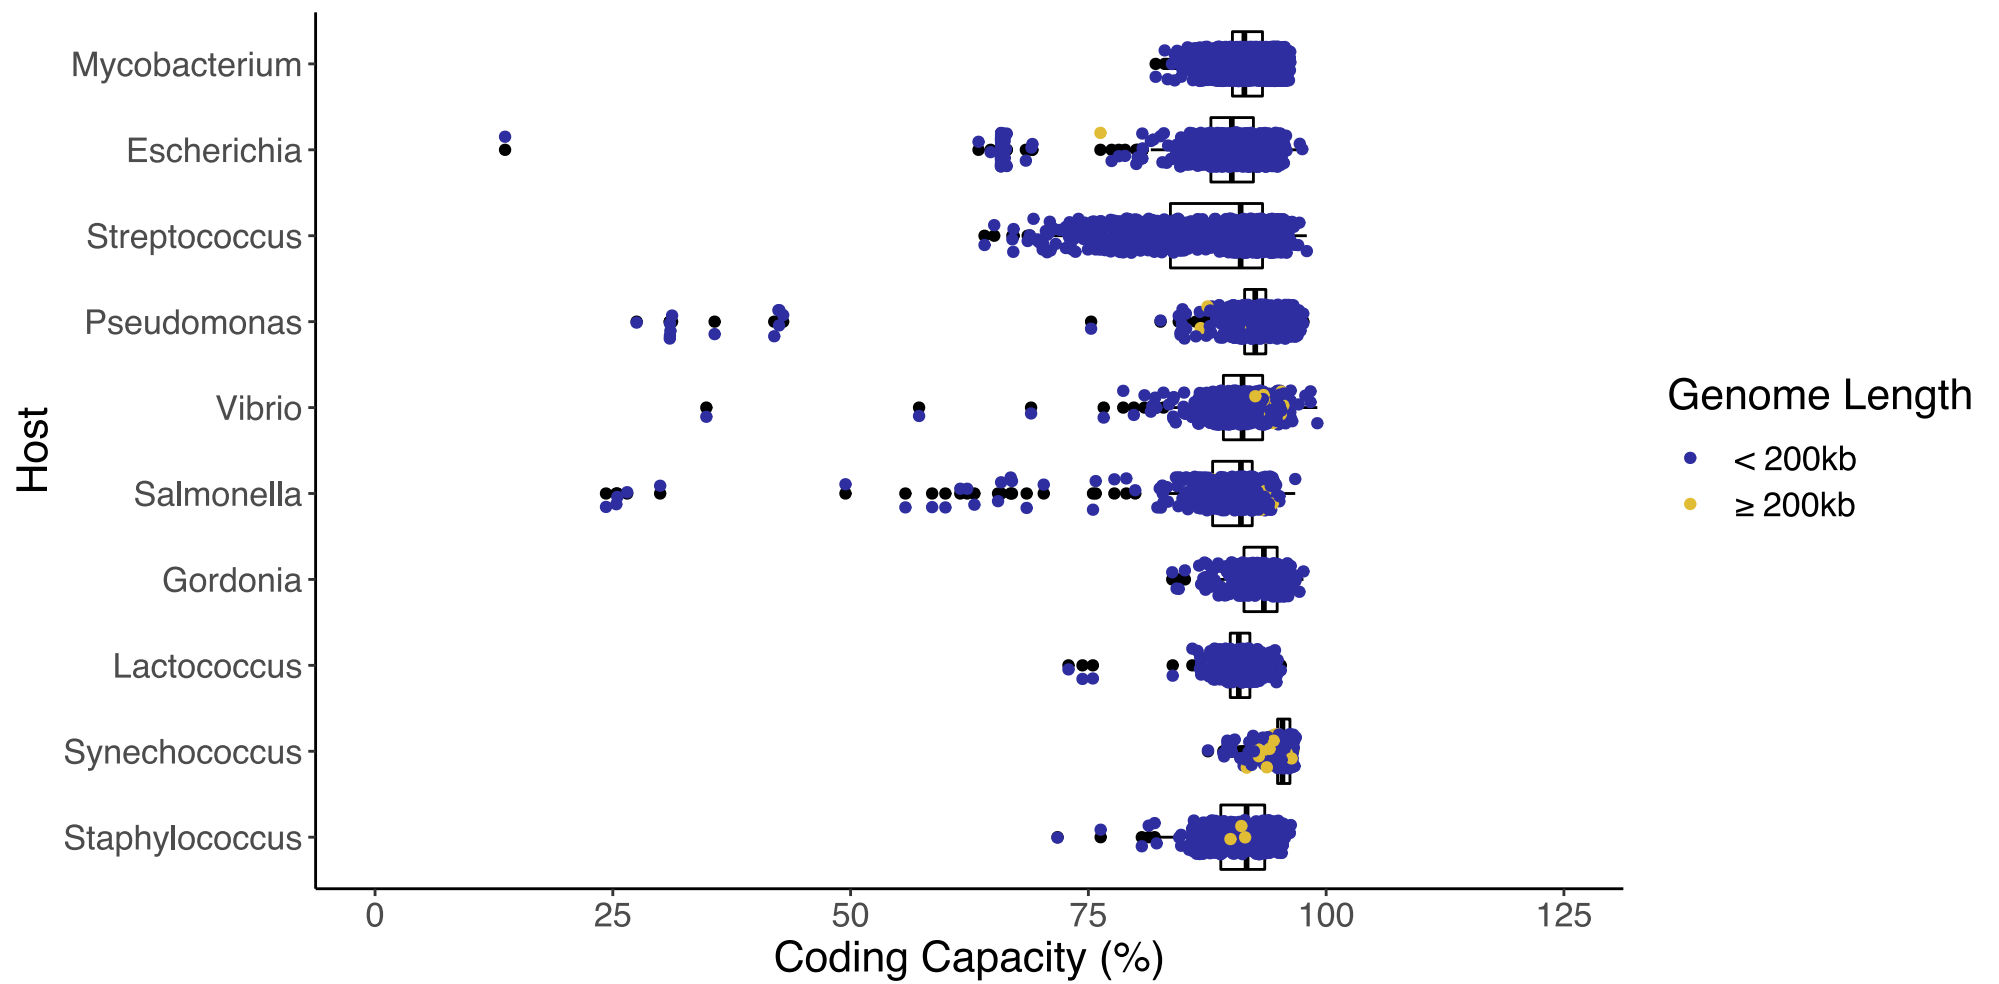

C

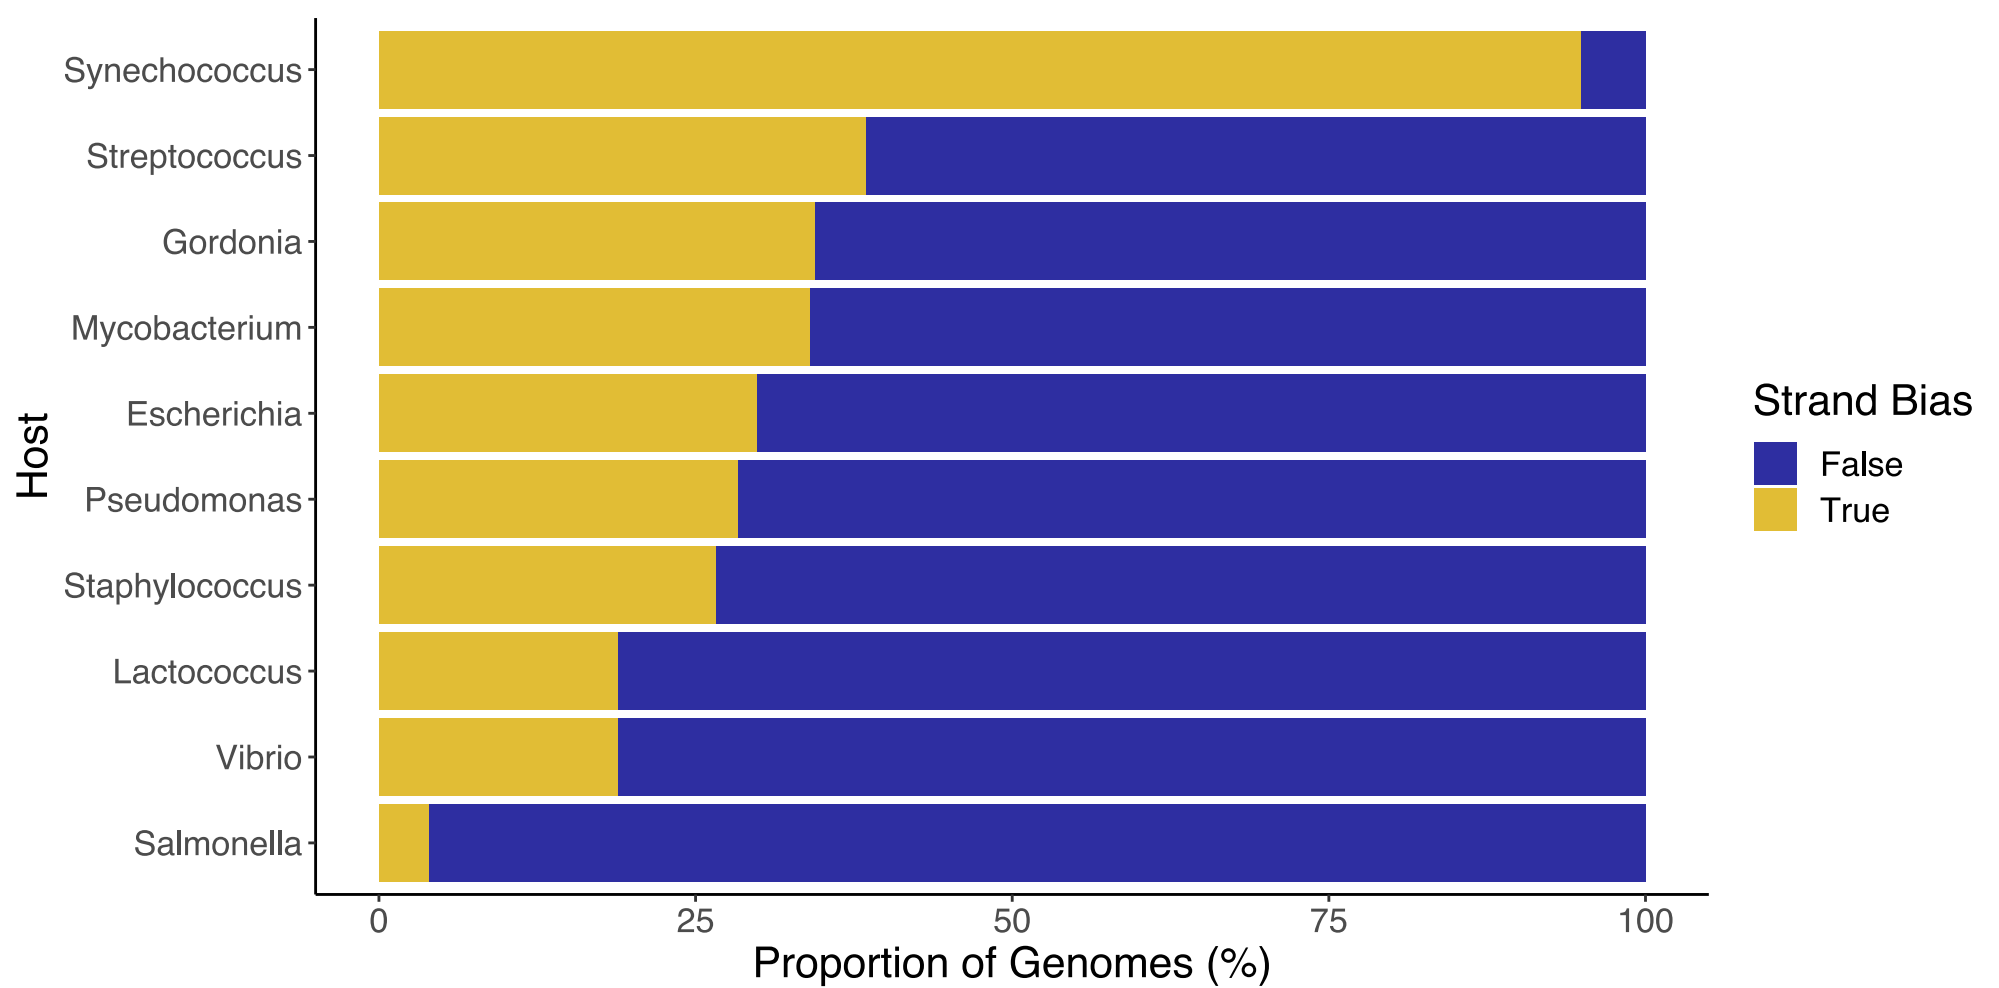

Supplement: supplementary_figure2.pdf [file supplementary_figure2.pdf]

Figure S3

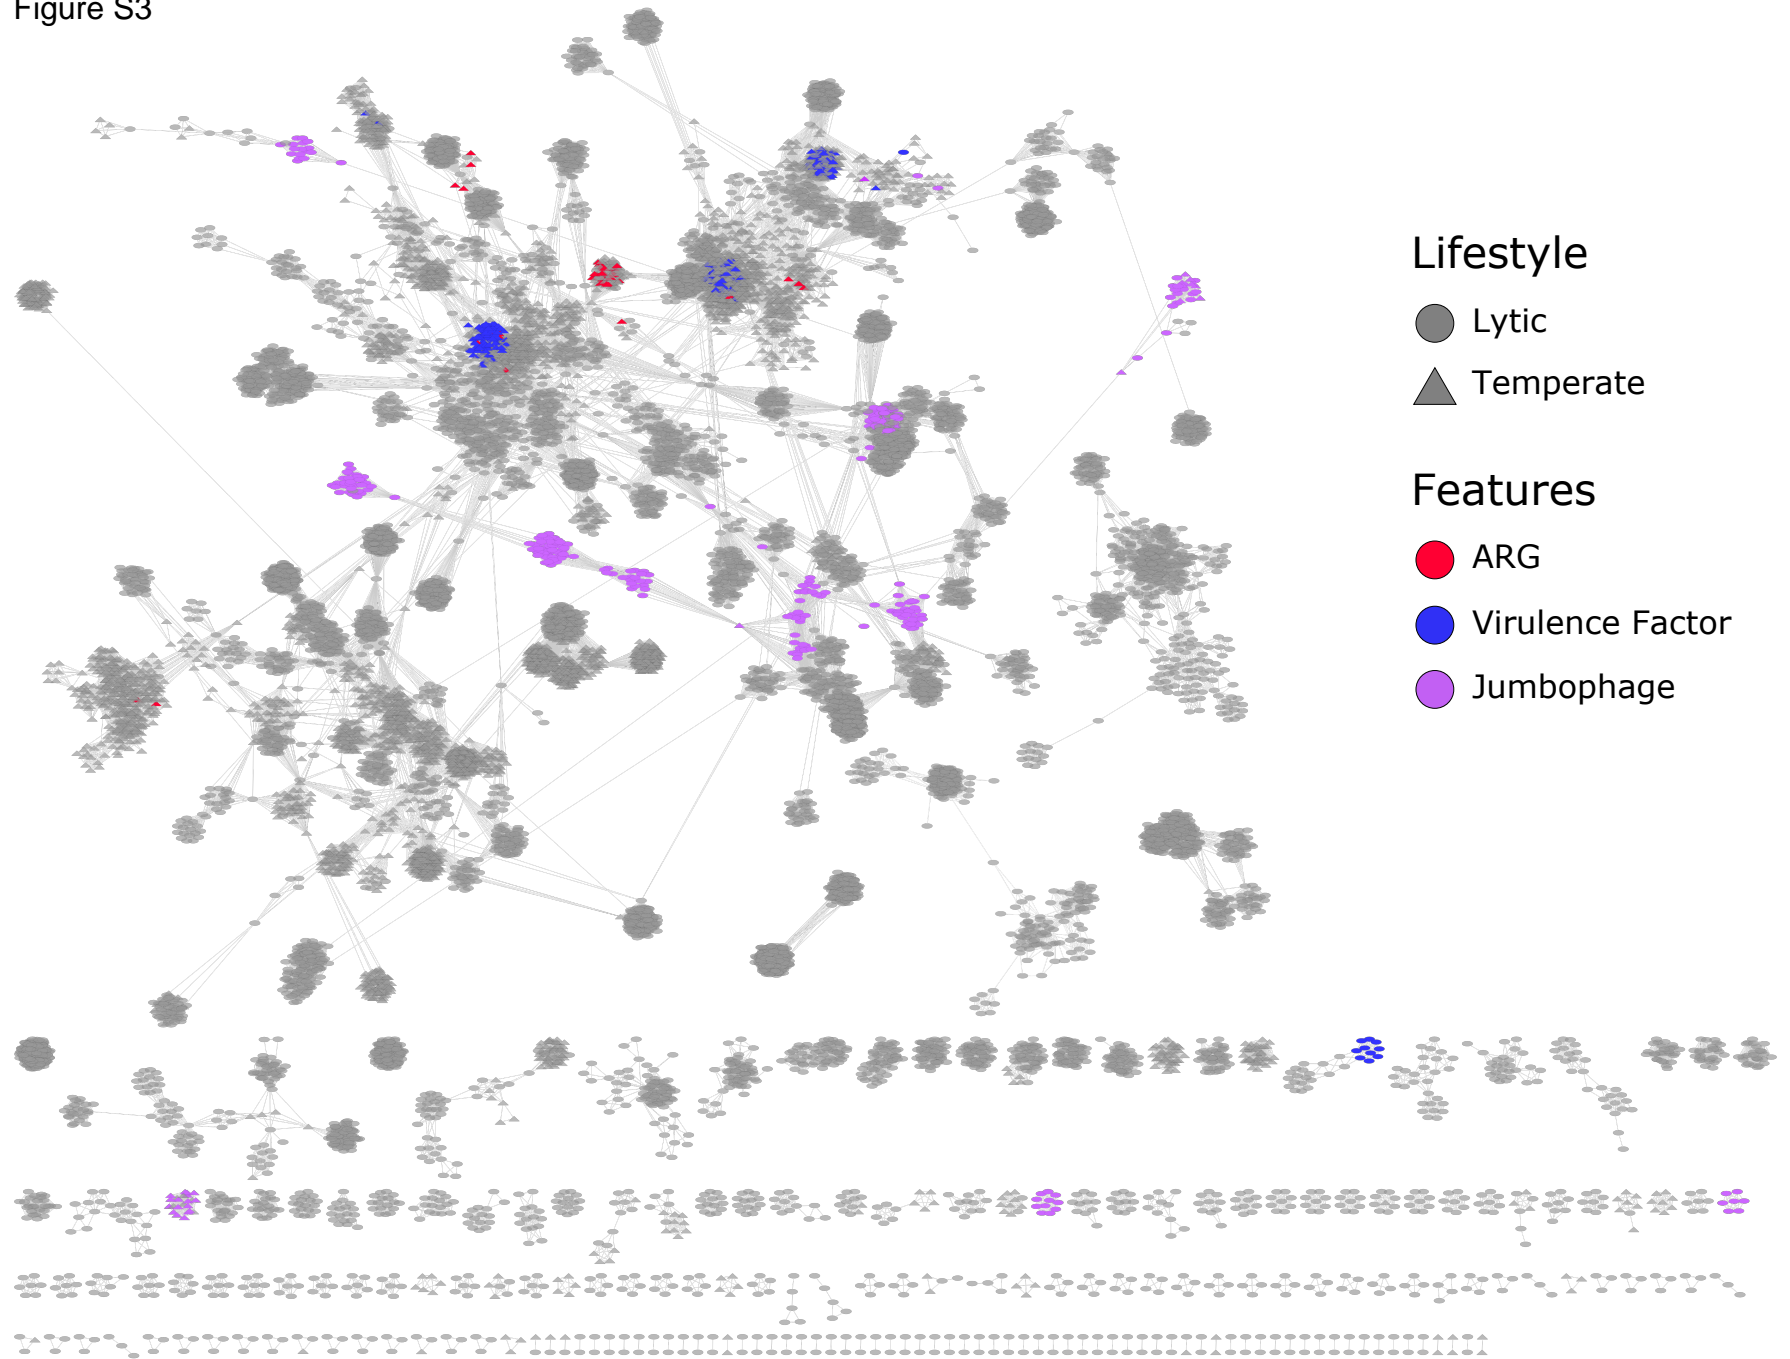

Supplement: supplementary_figure3.pdf [file supplementary_figure3.pdf]
